# Supplementary material
Source: publisher site journal article supplement (https://www.dovepress.com/get_supplementary_file.php?f=353576.docx)
Supplement: Supplementary file 1 [file get_supplementary_file.php]

**Supplementary Table 1.** 52 pyroptosis-related genes based on previous studies

| BAK1 | BAX | CASP1 | CASP3 | CASP4 |
| --- | --- | --- | --- | --- |
| CASP5 | CHMP2A | CHMP2B | CHMP3 | CHMP4A |
| CHMP4B | CHMP4C | CHMP6 | CHMP7 | CYCS |
| ELANE | GSDMD | GSDME | GZMB | HMGB1 |
| IL18 | IL1A | IL1B | IRF1 | IRF2 |
| TP53 | TP63 | AIM2 | CASP6 | CASP8 |
| CASP9 | GPX4 | GSDMA | GSDMB | GSDMC |
| IL6 | NLRC4 | NLRP1 | NLRP2 | NLRP3 |
| NLRP6 | NLRP7 | NOD1 | NOD2 | PJVK |
| PLCG1 | PRKACA | PYCARD | SCAF11 | TIRAP |
| TNF | GZMA |  |  |  |

**Supplementary Table 2.** 35 DEGs between the high- and low-risk groups in TCGA cohort

| gene | lowMean | highMean | logFC | pValue | fdr |
| --- | --- | --- | --- | --- | --- |
| PTGDS | 3.312517178 | 2.086706414 | -1.225810764 | 3.79666E-10 | 7.00623E-08 |
| CXCL1 | 3.906562457 | 5.01443597 | 1.107873513 | 1.27999E-05 | 0.000162217 |
| MMP1 | 2.6562804 | 3.877240447 | 1.220960048 | 3.75189E-06 | 6.02694E-05 |
| PTHLH | 2.051796357 | 3.090185402 | 1.038389045 | 8.74942E-06 | 0.000120579 |
| SLC7A5 | 4.265111785 | 5.433536688 | 1.168424903 | 7.72489E-10 | 1.0077E-07 |
| ADH7 | 2.932691312 | 1.734776165 | -1.197915148 | 1.19462E-05 | 0.000154505 |
| KRT15 | 5.882885243 | 4.560779532 | -1.322105711 | 3.44524E-05 | 0.000353687 |
| MAL | 2.788818951 | 1.705134239 | -1.083684712 | 8.20143E-06 | 0.000114066 |
| PTN | 2.937529328 | 1.878509966 | -1.059019362 | 9.43698E-07 | 2.08164E-05 |
| BNIPL | 2.954628443 | 1.910859694 | -1.043768749 | 1.85814E-08 | 1.04915E-06 |
| CYP4B1 | 2.521811407 | 1.098189114 | -1.423622292 | 2.89386E-10 | 5.91756E-08 |
| SOX2 | 4.038928726 | 2.722976831 | -1.315951895 | 1.50004E-06 | 3.02648E-05 |
| IL1A | 1.256389923 | 2.547881918 | 1.291491995 | 4.57702E-10 | 7.87039E-08 |
| CALML3 | 5.991025924 | 4.950984774 | -1.04004115 | 0.000508561 | 0.002992048 |
| FSCN1 | 4.781961061 | 5.811501807 | 1.029540746 | 5.11479E-15 | 1.93492E-11 |
| GABRP | 3.917670854 | 2.118647265 | -1.799023589 | 2.01118E-09 | 2.02888E-07 |
| SPINK5 | 3.474434581 | 2.464619924 | -1.009814657 | 5.448E-05 | 0.000514428 |
| CCL19 | 3.373320542 | 1.591298905 | -1.782021637 | 2.19684E-13 | 4.15533E-10 |
| CALML5 | 5.729538021 | 3.810102786 | -1.919435235 | 1.33443E-06 | 2.75104E-05 |
| ALDH1A1 | 3.246523328 | 2.233938024 | -1.012585304 | 1.80458E-06 | 3.49194E-05 |
| KRT4 | 4.134679452 | 2.586415541 | -1.548263911 | 1.82917E-05 | 0.000213885 |
| CXCL14 | 4.592469222 | 3.359501267 | -1.232967955 | 2.55451E-06 | 4.48433E-05 |
| F3 | 3.739352101 | 4.7840233 | 1.044671199 | 4.49938E-06 | 7.00459E-05 |
| SPRR3 | 5.229160174 | 3.91938676 | -1.309773414 | 0.001240978 | 0.006136756 |
| KRT14 | 6.341314471 | 7.556698097 | 1.215383627 | 0.005848456 | 0.020809001 |
| APOC1 | 4.675551364 | 3.595533028 | -1.080018335 | 6.30552E-08 | 2.78991E-06 |
| KRT13 | 7.161572821 | 5.689469839 | -1.472102982 | 0.001099136 | 0.005626983 |
| CX3CL1 | 3.646604954 | 2.3806858 | -1.265919153 | 4.43892E-11 | 1.46021E-08 |
| PLAC8 | 2.535183586 | 1.441664092 | -1.093519494 | 7.31729E-10 | 9.71274E-08 |
| SFRP4 | 3.065907314 | 1.865288601 | -1.200618714 | 6.28948E-08 | 2.78991E-06 |
| LAMC2 | 4.181369463 | 5.331142501 | 1.149773038 | 5.23651E-09 | 4.0428E-07 |
| CCL20 | 2.206486322 | 3.238927131 | 1.032440809 | 1.07604E-05 | 0.000143586 |
| FAM3B | 1.973377658 | 0.814861045 | -1.158516613 | 4.93969E-12 | 2.89092E-09 |
| SERPINE1 | 3.275713677 | 4.348011552 | 1.072297875 | 7.973E-09 | 5.74512E-07 |
| BMP7 | 3.248368123 | 2.229358101 | -1.019010022 | 4.62497E-07 | 1.22781E-05 |
